# Supplementary material for: Baseline for ostracod-based northwestern Pacific and Indo-Pacific shallow-marine paleoenvironmental reconstructions: ecological modeling of species distributions
Source: Copernicus journal article supplement (doi:10.5194/bg-16-585-2019), 2019-02-01
Supplement: Supplementary file 1 [file bg-16-585-2019-supplement.zip]

Archive with 3 entries (3 files):
- Supplement A.xlsx
- Supplement B.xlsx
- bg-16-585-2019-supplement-title-page.pdf
