# Supplementary material for: Baseline for ostracod-based northwestern Pacific and Indo-Pacific shallow-marine paleoenvironmental reconstructions: ecological modeling of species distributions
Source: Copernicus journal article supplement (doi:10.5194/bg-16-585-2019), 2019-02-01
Supplement: Supplementary file 1 [file bg-16-585-2019-supplement.zip › bg-16-585-2019-supplement-title-page.pdf]

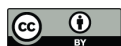

*Supplement of*

**Baseline for ostracod-based northwestern Pacific and Indo-Pacific  
shallow-marine paleoenvironmental reconstructions:  
ecological modeling of species distributions**

**Yuanyuan Hong et al.**

*Correspondence to:* Yuanyuan Hong (oocirclr@gmail.com) and Moriaki Yasuhara (moriakiyasuhara@gmail.com)

- [bg-16-585-2019-supplement-title-page.pdf](#)
- [Supplement A.xlsx](#)
- [Supplement B.xlsx](#)

The copyright of individual parts of the supplement might differ from the CC BY 4.0 License.
