# Supplementary material for: Baseline for ostracod-based northwestern Pacific and Indo-Pacific shallow-marine paleoenvironmental reconstructions: ecological modeling of species distributions
Source: Copernicus journal article supplement (doi:10.5194/bg-16-585-2019), 2019-02-01
Supplement: Supplementary file 1 [file bg-16-585-2019-supplement.zip › Supplement A.xlsx]

## Sheet: Sheet1
Supplement A
Taxa\Sites	DS2	DS3	DS4	ES1	ES2	ES3	ES4	ES5	JS2	MS1	MS13	MS14	MS15
Aglaiocypris spp.		1			1	4	1		1				2
Alataconcha cf. pterogona					1
Alocopocythere goujoni	36	6	9		2		1					1	2
Argilloecia lunata					1
Argilloecia sp.					1	1
Atjehella cf. semiplicata				2	1		2
Aurila cf. uranouchiensis
Aurila cf. disparata		1	5		3		6		3	2
Aurila cf. hataii				1	3				2	1
Aurila sp. 1			1	1	3
Aurila sp. 2			1	7	3	3					1
Aurila spinifera
Bicornucythere bisanensis s.l.	33	39	22	9	1	7	14		6	2	1		6
Bythoceratina cassidoidea				1
Bythoceratina cf. callidictya					1
Bythoceratina orientalis
Bythoceratina robusta					2		1
Bythoceratina sheyangensis
Bythoceratina sp. 1
Bythoceratina sp. 2
Bythocypris spp.	1						1
Bythocythere sp.					5		1
Callistocythere aff. undulatifacialis				2	1	1	3		4
Callistocythere aff. japonica					1
Callistocythere aff. reticurata
Callistocythere asiatica				2		1
Callistocythere cf. multirugosa			1				1					2	1
Callistocythere cf. nipponica
Callistocythere sp. 1
Callistocythere sp. 2
Callistocythere sp. 3
Caudites sp. 1
Caudites sp. 2
Caudites sp. 3					1
Caudites sp. 4
Cletocythereis sp.						1
Copytus posterosulcus		2	7	1	2	2	3		2	1	1	1	8
Cornucoquimba cf. gibboidea				4	5	6	17	1	4	3
Cornucoquimba pustulata				2
Cornucoquimba sp. 1					1					2
Cornucoquimba sp. 2
Cyprideis sp.
Cythere omotenipponica			1	1	2
Cytherelloidea cingulata					1
Cytherelloidea yingliensis													1
Cytherois spp.	2		2	1	7	9	12	3	2	6			1
Cytheropteron cf. ignobilis			2	2	4	2	1				1		2
Cytheropteron higashikawai					1
Cytheropteron miurense			2	3	15	3	1		4			1
Cytheropteron ushioi									1
Darwinula sp.
Eucythere sp.												1
Foveoleberis ymchengi
Hanaiborchella cf. miurensis			2								1
Hemicytheridea reticulata		2								3
Hemicytherura cf. cuneata			1	4	7	1					2		1
Hemicytherura cf. kajiyamai				1			1		1			1
Hemicytherura kajiyamai				1		1	2
Hemicytherura sp.	3		3
Hemikrithe orientalis				1	1						13	6	8
Hemikrithe sp.						1
Hermanites bicostata
Javanella kendengensis							1
Keijella cf. apta
Keijella kloempritensis	1	1	11	4	2		2		1		15	20	21
Keijella sp.
Keijia demissa			2	1		1	1		2
Kotoracythere doratus							1
Krithe japonica					1						2	1	3
Leptocythere pulchra							2
Loxoconcha cf. kattoi					4	13	5	1		2		1
Loxoconcha epeterseni				5	6	2	8		5
Loxoconcha japonica				1	2	3	5		6	3			1
Loxoconcha kattoi			2			4
Loxoconcha malayensis			3	11	11	8	18	1	8	7			1
Loxoconcha pulchra			1
Loxoconcha sp.			1	2		6	8	10	4
Loxoconcha zhejiangensis			3
Microcythere sp.					1
Morkhovenia inconspicua										1
Munseyella japonica		1	5	2	3	1	2				3	1	1
Munseyella sp.
Neocyprideis sp.
Neocytheretta faceta			1		1		1			1
Neocytheretta snellii				1			1
Neocytheretta sp.											1
Neocytheromorpha regalis			1	1
Neomonoceratina delicata	119	86	64	25	33	123	12	3	104	38	101	71	55
Neonesidea spp.				4	4	6	16		5	2
Neopellucistoma inflatum
Neosinocythere elongata	8	4	27	1	1				1		3	1	8
Nipponocythere delicata			1	8	15	4	4		10			7	12
Nipponocythere sp.				2
Pacambocythere sp.
Paracathaycythere cf. costaereticulata
Paracypris spp.				3	1	2	1		2	2
Paracytheridea tschoppi
Paracytherois cf. acuminata			1		2	5				2
Paracytherois sp.									1
Paradoxostomatid	1			1	8	1	3	5	1
Parakrithella cf. pseudadonta				2	1				1
Parakrithella sp.												1
Phlyctocythere japonica			1	3	8		1			1	6	4	5
Phlyctocythere sp.1						1
Phlyctocythere sp.2
Pistocythereis aff. miaoliensis	4	1
Pistocythereis bradyformis				6	6	3	3		2	2	1	5	7
Pistocythereis bradyi				18	15	3	2		19	19	30	26	37
Pistocythereis euplectella				2	1						4	1	2
Pistocythereis subovata			11		5	2	2		4	8	7	9	4
Pontocythere cf. miurensis
Pontocythere cf. subjaponica		2	1				1
Pontocythere sp. 1					1	1
Pontocythere sp. 2				1
Pontocythere sp. 3
Pontocythere sp. 4					1	1							1
Pontocythere sp. 5
Propontocypris spp.	4	3	10	37	32	9	14		13	13	2	10	9
Pseudocythere cf. caudata
Robustauria cf. ishizaki		1		1	2		4		1
Semicytherura cf. miurensis
Semicytherura cf. undata					1
Semicytherura cf. wakamurasaki
Semicytherura indonesiana
Semicytherura minaminipponica
Semicytherura sp. 1				1					1		3
Semicytherura sp. 2
Semicytherura sp. 3				2	2				1
Sinocythere dongtaiensis			1
Sinocythere sinensis	1	1	3									1
Sinocythere sp.
Sinocytheridea impressa	68	48	87	20	10	10	5	1	126	126	29	47	31
Sinoleberis tosaensis
Spinileberis quadriaculeata	2	1	3	2	1	2	2		8	16
Spinileberis rhomboidalis	1		3	1	1	1
Stigmatocythere cf. roesmani				1	2	4	1
Stigmatocythere costa
Stigmatocythere kingmai	2		4			1						1
Stigmatocythere roesmani		3	4	9	8		1		3		6	7	18
Tanella gracillis				2			1
Trachyleberididae							1		1
Trachyleberis sp.													1
Triebelina aff. sertata					1					2
Triebelina schyroconcha
Xestoleberis spp.	1	7	3	6	10	8	17		2	5
Xiphichilus sp.
Gen et sp. indet 1
Gen et sp. indet 2
Gen et sp. indet 3									1
Gen et sp. indet 4									1
Gen et sp. indet 5
Sum	287	210	313	232	280	268	214	25	364	270	233	227	249
no. of specimens /100 ml	574	13440	6677.33	4949.33	4480	268	3424	25	970.667	1080	1864	908	2656
Fraction	0.5	0.015625	0.046875	0.046875	0.0625	1	0.0625	1	0.375	0.25	0.125	0.25	0.09375
E(S100)	11.1571	13.6038	24.6482	35.3051	39.0303	28.0221	34.6404	-	22.1456	18.3275	16.2884	17.1979	20.6464
Taxa\Sites	MS16	MS17	MS2	MS3	MS4	MS5	MS6	MS7	MS8	NS2	NS3	NS4	NS5
Aglaiocypris spp.	3	5		5	2	3	1			1	2	1	4
Alataconcha cf. pterogona
Alocopocythere goujoni	1			1						1	7	3	4
Argilloecia lunata		1
Argilloecia sp.
Atjehella cf. semiplicata
Aurila cf. uranouchiensis												1
Aurila cf. disparata			1	1				3		4		1	2
Aurila cf. hataii		1					2	3
Aurila sp. 1	1					2					1
Aurila sp. 2	2									11	3	1
Aurila spinifera
Bicornucythere bisanensis s.l.	2	3	29	6			7	2		13	23	21	12
Bythoceratina cassidoidea											1
Bythoceratina cf. callidictya
Bythoceratina orientalis										3
Bythoceratina robusta										2			1
Bythoceratina sheyangensis
Bythoceratina sp. 1											1
Bythoceratina sp. 2
Bythocypris spp.
Bythocythere sp.
Callistocythere aff. undulatifacialis						1	1	1
Callistocythere aff. japonica
Callistocythere aff. reticurata
Callistocythere asiatica
Callistocythere cf. multirugosa
Callistocythere cf. nipponica
Callistocythere sp. 1	1										1
Callistocythere sp. 2
Callistocythere sp. 3
Caudites sp. 1
Caudites sp. 2
Caudites sp. 3				1								1
Caudites sp. 4
Cletocythereis sp.
Copytus posterosulcus	3					3			1	4	1	2	1
Cornucoquimba cf. gibboidea							1			6	4	1	1
Cornucoquimba pustulata	1									1
Cornucoquimba sp. 1				1			1
Cornucoquimba sp. 2	1						1
Cyprideis sp.
Cythere omotenipponica						1				1	1	1
Cytherelloidea cingulata
Cytherelloidea yingliensis	1
Cytherois spp.	1	2	2	3			1			1	2	1	1
Cytheropteron cf. ignobilis	1												1
Cytheropteron higashikawai
Cytheropteron miurense	1									11	4	1	1
Cytheropteron ushioi
Darwinula sp.
Eucythere sp.
Foveoleberis ymchengi
Hanaiborchella cf. miurensis										5		1
Hemicytheridea reticulata			6	1							1
Hemicytherura cf. cuneata	1					1			1		2	1
Hemicytherura cf. kajiyamai	1
Hemicytherura kajiyamai
Hemicytherura sp.											1
Hemikrithe orientalis	9								2
Hemikrithe sp.													1
Hermanites bicostata
Javanella kendengensis				1
Keijella cf. apta
Keijella kloempritensis	14	10		10	9	23	1		21	16	18	9	7
Keijella sp.
Keijia demissa	1					1				2	1
Kotoracythere doratus
Krithe japonica	2
Leptocythere pulchra							2
Loxoconcha cf. kattoi	1						2			1			3
Loxoconcha epeterseni			2	1			1	1	1	3	3	2
Loxoconcha japonica	1	1	1					3	1			1
Loxoconcha kattoi
Loxoconcha malayensis	2	3	8	3	1	1	6	1	2	5	3	5	1
Loxoconcha pulchra	2					1						2	2
Loxoconcha sp.								2
Loxoconcha zhejiangensis			12				1			1	1	1
Microcythere sp.
Morkhovenia inconspicua
Munseyella japonica							1		1	9	5	1
Munseyella sp.
Neocyprideis sp.
Neocytheretta faceta										7	1	2	2
Neocytheretta snellii										3	2
Neocytheretta sp.
Neocytheromorpha regalis												1
Neomonoceratina delicata	43	53	34	25	37	53	61	2	72	58	79	46	60
Neonesidea spp.		1					18	5	2	14	4
Neopellucistoma inflatum
Neosinocythere elongata	3					1			5	11	17	17	2
Nipponocythere delicata	23	26		13	7	22	18		4		1		4
Nipponocythere sp.										1
Pacambocythere sp.
Paracathaycythere cf. costaereticulata
Paracypris spp.							6	1				1
Paracytheridea tschoppi						1
Paracytherois cf. acuminata			1				2		2
Paracytherois sp.								1	2
Paradoxostomatid								3	4		1	1
Parakrithella cf. pseudadonta
Parakrithella sp.
Phlyctocythere japonica	6			1		3	1		13	1		1
Phlyctocythere sp.1
Phlyctocythere sp.2
Pistocythereis aff. miaoliensis
Pistocythereis bradyformis	11		1	1			1			12	11	5	3
Pistocythereis bradyi	31	20	8	19	14	7	25	1	16	1	4	1	32
Pistocythereis euplectella						1					1
Pistocythereis subovata	11	4	6	12	7	5	5			14	14	2	13
Pontocythere cf. miurensis
Pontocythere cf. subjaponica	1									1	1
Pontocythere sp. 1	1
Pontocythere sp. 2
Pontocythere sp. 3
Pontocythere sp. 4	1											1
Pontocythere sp. 5
Propontocypris spp.	29	55	5	20	76	65	44	6	33	7	9	4
Pseudocythere cf. caudata
Robustauria cf. ishizaki
Semicytherura cf. miurensis							1
Semicytherura cf. undata
Semicytherura cf. wakamurasaki
Semicytherura indonesiana
Semicytherura minaminipponica
Semicytherura sp. 1							2
Semicytherura sp. 2
Semicytherura sp. 3											1
Sinocythere dongtaiensis											1
Sinocythere sinensis											2	3
Sinocythere sp.
Sinocytheridea impressa	28	122	103	149	102	140	137	6	55	37	58	35	32
Sinoleberis tosaensis
Spinileberis quadriaculeata	1	8	7	4	1	2	31	8	5		3	1	11
Spinileberis rhomboidalis										1	7	3	1
Stigmatocythere cf. roesmani											1
Stigmatocythere costa	1										1
Stigmatocythere kingmai	1								1		1	5	1
Stigmatocythere roesmani	13	1				1			2	4	7	5	5
Tanella gracillis			3	1						1		1
Trachyleberididae
Trachyleberis sp.
Triebelina aff. sertata
Triebelina schyroconcha
Xestoleberis spp.	4		2	1		2	5	1	2	10	7	5	8
Xiphichilus sp.
Gen et sp. indet 1
Gen et sp. indet 2
Gen et sp. indet 3
Gen et sp. indet 4
Gen et sp. indet 5
Sum	261	316	231	280	256	340	386	50	248	284	320	198	216
no. of specimens /100 ml	8352	2528	616	11946.7	1365.33	3626.67	1544	50	1322.67	9088	5120	4224	2304
Fraction	0.03125	0.125	0.375	0.0234375	0.1875	0.09375	0.25	1	0.1875	0.03125	0.0625	0.046875	0.09375
E(S100)	24.8469	12.0495	14.4316	15.0372	8.34038	13.1382	16.728	-	16.5353	26.9524	27.2222	28.334	20.8687
Taxa\Sites	NS6	PS2	PS3	PS4	PS5	SS1	SS2	SS3	SS4	SS5	SS6	SS7	SS8
Aglaiocypris spp.	2	2	1		1	1		3	1	7		1
Alataconcha cf. pterogona
Alocopocythere goujoni	3					9	1	2			2
Argilloecia lunata					1	1
Argilloecia sp.
Atjehella cf. semiplicata							1	3	1		1
Aurila cf. uranouchiensis													1
Aurila cf. disparata	1						2	1	2		1	1
Aurila cf. hataii					1	2	1	1			1
Aurila sp. 1			1				3
Aurila sp. 2	1	1	1		3	4	2				1	3
Aurila spinifera												1
Bicornucythere bisanensis s.l.	7	43	15	37	3	6	3	2	5	4	14	3	2
Bythoceratina cassidoidea
Bythoceratina cf. callidictya
Bythoceratina orientalis
Bythoceratina robusta						1					1
Bythoceratina sheyangensis
Bythoceratina sp. 1
Bythoceratina sp. 2
Bythocypris spp.
Bythocythere sp.
Callistocythere aff. undulatifacialis					1	4	1	3	2	1	1		1
Callistocythere aff. japonica											1
Callistocythere aff. reticurata					1	1
Callistocythere asiatica					1						3
Callistocythere cf. multirugosa			2					1
Callistocythere cf. nipponica							1
Callistocythere sp. 1			1								1	1
Callistocythere sp. 2
Callistocythere sp. 3
Caudites sp. 1
Caudites sp. 2
Caudites sp. 3									1
Caudites sp. 4
Cletocythereis sp.
Copytus posterosulcus	6	1			5	4	5	6	7	1	3	1	2
Cornucoquimba cf. gibboidea	1	2			13	13	2	2	3		2	1
Cornucoquimba pustulata
Cornucoquimba sp. 1		1				4	4
Cornucoquimba sp. 2								1
Cyprideis sp.
Cythere omotenipponica		1				1
Cytherelloidea cingulata					1
Cytherelloidea yingliensis
Cytherois spp.		7	2	4	7	11	3	1	3		8
Cytheropteron cf. ignobilis						1	1
Cytheropteron higashikawai
Cytheropteron miurense					2	4	2	1	1		1
Cytheropteron ushioi
Darwinula sp.		1
Eucythere sp.
Foveoleberis ymchengi
Hanaiborchella cf. miurensis	1					1					1		1
Hemicytheridea reticulata		2		3							15
Hemicytherura cf. cuneata	1				1	2	5		2			1
Hemicytherura cf. kajiyamai					2						1
Hemicytherura kajiyamai											1
Hemicytherura sp.											3
Hemikrithe orientalis	1				4	4	10	1
Hemikrithe sp.												1
Hermanites bicostata
Javanella kendengensis						2
Keijella cf. apta
Keijella kloempritensis	10	3	3		5	8	23	13	9		16
Keijella sp.
Keijia demissa					2	2			1
Kotoracythere doratus					1				1
Krithe japonica							1	1
Leptocythere pulchra						1
Loxoconcha cf. kattoi		4				2		1			2	1
Loxoconcha epeterseni			4		2	2	2	2
Loxoconcha japonica		5	5		7	10	1	3	2		1
Loxoconcha kattoi											1	5
Loxoconcha malayensis	1	2		1	6	24	7	4	3	2	13	2	1
Loxoconcha pulchra			2	1									1
Loxoconcha sp.		1	2	1	2		5	2				7
Loxoconcha zhejiangensis		3		4			1
Microcythere sp.							1
Morkhovenia inconspicua			1			1
Munseyella japonica	2	1	1			1	5	1	5	2	4
Munseyella sp.
Neocyprideis sp.
Neocytheretta faceta					2						2
Neocytheretta snellii					1
Neocytheretta sp.								1
Neocytheromorpha regalis											1
Neomonoceratina delicata	41	46	34	47	23	53	46	48	117	52	52	11	12
Neonesidea spp.			1		4	6	4		2	1		24	4
Neopellucistoma inflatum							1	1	1
Neosinocythere elongata	11					3	5	3	16	1	25
Nipponocythere delicata	4	1		1	9	27	11	9	15		7
Nipponocythere sp.
Pacambocythere sp.						1	1
Paracathaycythere cf. costaereticulata
Paracypris spp.												2	5
Paracytheridea tschoppi
Paracytherois cf. acuminata			1		1						1
Paracytherois sp.
Paradoxostomatid	6				1	3	1		1		4	9	1
Parakrithella cf. pseudadonta			1
Parakrithella sp.
Phlyctocythere japonica	1				6	26	13	3	19		2
Phlyctocythere sp.1
Phlyctocythere sp.2
Pistocythereis aff. miaoliensis
Pistocythereis bradyformis	2				3	3	5	3			8	1
Pistocythereis bradyi	12	20	9	8	20	44	36	32	46	36	50	2	7
Pistocythereis euplectella					2	3	1
Pistocythereis subovata	8	3	2	1	6	7	4	9	7	4	9	2
Pontocythere cf. miurensis
Pontocythere cf. subjaponica											5
Pontocythere sp. 1							1
Pontocythere sp. 2
Pontocythere sp. 3									1
Pontocythere sp. 4	1										1
Pontocythere sp. 5
Propontocypris spp.	12	13	1	2	6	16	15	8	84	40	1	11	12
Pseudocythere cf. caudata											1
Robustauria cf. ishizaki					2
Semicytherura cf. miurensis
Semicytherura cf. undata
Semicytherura cf. wakamurasaki											1		1
Semicytherura indonesiana					1							1
Semicytherura minaminipponica
Semicytherura sp. 1							1				1
Semicytherura sp. 2							1
Semicytherura sp. 3	1						1		1
Sinocythere dongtaiensis											1
Sinocythere sinensis	2	1						2	1		4
Sinocythere sp.											2
Sinocytheridea impressa	72	48	166	126	67	68	68	50	136	220	63	30	129
Sinoleberis tosaensis
Spinileberis quadriaculeata		14	5	2			1		1	1	1	4
Spinileberis rhomboidalis	2										3
Stigmatocythere cf. roesmani						6	2		1		1
Stigmatocythere costa					1						2
Stigmatocythere kingmai	1			1
Stigmatocythere roesmani	2				4	5	3	6	9	1	20
Tanella gracillis	1	1	1		1	2		1			2
Trachyleberididae								1	1
Trachyleberis sp.
Triebelina aff. sertata						1
Triebelina schyroconcha									1
Xestoleberis spp.	1	8	4	3	5	17	12	4	6	4	6	3	2
Xiphichilus sp.							1
Gen et sp. indet 1
Gen et sp. indet 2		1				1
Gen et sp. indet 3
Gen et sp. indet 4
Gen et sp. indet 5
Sum	217	236	266	242	237	419	327	236	515	377	375	129	182
no. of specimens /100 ml	3472	629.333	1064	387.2	7584	13408	4185.6	5034.67	1030	754	2000	129	728
Fraction	0.0625	0.375	0.25	0.625	0.03125	0.03125	0.078125	0.046875	0.5	0.5	0.1875	1	0.25
E(S100)	21.9478	19.5665	15.4531	11.1464	30.3839	28.9479	29.1112	26.3084	18.3505	9.53028	28.9246	23.2965	12.181
Taxa\Sites	TS2	TS3	TS4	TS5	TS7	VS10	VS13	VS19	VS21	VS5	VS6	VS9	WS2
Aglaiocypris spp.		2	2	2	2						2		4
Alataconcha cf. pterogona												1
Alocopocythere goujoni						2		6				4
Argilloecia lunata
Argilloecia sp.
Atjehella cf. semiplicata												3	2
Aurila cf. uranouchiensis	1
Aurila cf. disparata	4	2			4	2			1			5	1
Aurila cf. hataii	1					2	7			1		6
Aurila sp. 1								1
Aurila sp. 2						5	3	1					3
Aurila spinifera										3
Bicornucythere bisanensis s.l.	42	40	33	9	71	4	2	6				8	7
Bythoceratina cassidoidea								1
Bythoceratina cf. callidictya
Bythoceratina orientalis						1
Bythoceratina robusta						1
Bythoceratina sheyangensis													1
Bythoceratina sp. 1
Bythoceratina sp. 2												1
Bythocypris spp.							3
Bythocythere sp.
Callistocythere aff. undulatifacialis	1					5	4	5				5	2
Callistocythere aff. japonica
Callistocythere aff. reticurata	1							1
Callistocythere asiatica						1
Callistocythere cf. multirugosa		1
Callistocythere cf. nipponica						2
Callistocythere sp. 1												1
Callistocythere sp. 2
Callistocythere sp. 3
Caudites sp. 1
Caudites sp. 2
Caudites sp. 3	1
Caudites sp. 4	1
Cletocythereis sp.													1
Copytus posterosulcus	1					2		2			1	3	5
Cornucoquimba cf. gibboidea	4		1	1	1	7		3		2		3	3
Cornucoquimba pustulata
Cornucoquimba sp. 1						2		1				3
Cornucoquimba sp. 2												1
Cyprideis sp.					1
Cythere omotenipponica												1
Cytherelloidea cingulata
Cytherelloidea yingliensis
Cytherois spp.	3	1	1		6	4		9				4	3
Cytheropteron cf. ignobilis						1						1	5
Cytheropteron higashikawai
Cytheropteron miurense						2		24				1	2
Cytheropteron ushioi
Darwinula sp.
Eucythere sp.
Foveoleberis ymchengi
Hanaiborchella cf. miurensis												1
Hemicytheridea reticulata	8	5	4		1	1						1
Hemicytherura cf. cuneata						1				1
Hemicytherura cf. kajiyamai
Hemicytherura kajiyamai													1
Hemicytherura sp.											1
Hemikrithe orientalis						1						4	2
Hemikrithe sp.				1								1
Hermanites bicostata
Javanella kendengensis												1
Keijella cf. apta
Keijella kloempritensis			13	25		3	2	1			4	17	14
Keijella sp.
Keijia demissa						1		1		1		1	3
Kotoracythere doratus
Krithe japonica
Leptocythere pulchra
Loxoconcha cf. kattoi	2		2		24	5	9
Loxoconcha epeterseni	1					9							1
Loxoconcha japonica	3		1		36	3		1				3
Loxoconcha kattoi					22		5	2				2
Loxoconcha malayensis	3	2	2	1		4		21		6	1	11	6
Loxoconcha pulchra								1
Loxoconcha sp.	1				42	7	68	2		1	1	6	2
Loxoconcha zhejiangensis	11	3	3		15
Microcythere sp.
Morkhovenia inconspicua						2
Munseyella japonica	1					1	1	1				4	7
Munseyella sp.
Neocyprideis sp.						1
Neocytheretta faceta						4							4
Neocytheretta snellii
Neocytheretta sp.
Neocytheromorpha regalis
Neomonoceratina delicata	10	10	19	17	5	17	28	9			6	33	42
Neonesidea spp.	2		1	2	1	33	9	2		1		12	1
Neopellucistoma inflatum												3
Neosinocythere elongata												2	12
Nipponocythere delicata			2	6			2	4				24	11
Nipponocythere sp.						3							1
Pacambocythere sp.
Paracathaycythere cf. costaereticulata
Paracypris spp.		1		1		2		1		1
Paracytheridea tschoppi						1
Paracytherois cf. acuminata	1		1					1				1
Paracytherois sp.
Paradoxostomatid			1			2	6				2		3
Parakrithella cf. pseudadonta												5
Parakrithella sp.										2
Phlyctocythere japonica				2		2						4	4
Phlyctocythere sp.1
Phlyctocythere sp.2
Pistocythereis aff. miaoliensis
Pistocythereis bradyformis	3		4	1	1	7				3		6	2
Pistocythereis bradyi	5	1	13	10	1	8		28		2	1	41	19
Pistocythereis euplectella				1								2	1
Pistocythereis subovata	2	4	4	8		7		10	1			6	7
Pontocythere cf. miurensis
Pontocythere cf. subjaponica
Pontocythere sp. 1
Pontocythere sp. 2
Pontocythere sp. 3
Pontocythere sp. 4
Pontocythere sp. 5
Propontocypris spp.	3	12	22	178		12	28	1		2	1	7	22
Pseudocythere cf. caudata
Robustauria cf. ishizaki
Semicytherura cf. miurensis													1
Semicytherura cf. undata
Semicytherura cf. wakamurasaki
Semicytherura indonesiana
Semicytherura minaminipponica								1
Semicytherura sp. 1						1		2				1
Semicytherura sp. 2
Semicytherura sp. 3							1					1
Sinocythere dongtaiensis												1	1
Sinocythere sinensis
Sinocythere sp.
Sinocytheridea impressa	63	83	99	66	42	13	2	99	3	1	5	48	25
Sinoleberis tosaensis
Spinileberis quadriaculeata	37	31	18	22	19				3		1	8	3
Spinileberis rhomboidalis
Stigmatocythere cf. roesmani
Stigmatocythere costa													2
Stigmatocythere kingmai						2
Stigmatocythere roesmani												2	5
Tanella gracillis										3			1
Trachyleberididae								4
Trachyleberis sp.
Triebelina aff. sertata
Triebelina schyroconcha
Xestoleberis spp.	5	5	5	1	13	22	14	6	1	4	1	18	12
Xiphichilus sp.
Gen et sp. indet 1
Gen et sp. indet 2
Gen et sp. indet 3
Gen et sp. indet 4
Gen et sp. indet 5
Sum	221	203	251	354	307	218	194	258	9	34	27	328	254
no. of specimens /100 ml	221	464	669.333	354	307	872	194	825.6	9	34	27	2624	1016
Fraction	1	0.4375	0.375	1	1	0.25	1	0.3125	1	1	1	0.125	0.25
E(S100)	20.9893	12.9436	16.2649	12.146	14.0587	34.0021	15.7748	21.7855	-	-	-	31.6475	30.6568
