# Supplementary material for: Baseline for ostracod-based northwestern Pacific and Indo-Pacific shallow-marine paleoenvironmental reconstructions: ecological modeling of species distributions
Source: Copernicus journal article supplement (doi:10.5194/bg-16-585-2019), 2019-02-01
Supplement: Supplementary file 1 [file bg-16-585-2019-supplement.zip › Supplement B.xlsx]

## Sheet: Sheet1
Supplement B
				Relative abundance (%) of common species																			Environmental Variables
Station	Region	Latitude	Longtitude	Sinocytheridea impressa	Neomonoceratina delicata	Propontocypris spp.	Pistocythereis bradyi	Bicornucythere bisanensis s.l.	Keijella kloempritensis	Nipponocythere bicarinata	Spinileberis quadriaculeata	Xestoleberis spp.	Pistocythereis subovata	Loxoconcha malayensis	Neonesidea spp.	Neosinocythere elongata	Stigmatocythere roesmani	Phlyctocythere japonica	Alocopocythere goujoni	Hemikrithe orientalis	Loxoconcha epeterseni	Hemicytheridea reticulata	Chlorophyll_a (μg/L)	Water Depth (m)	Oxygen (mg/L)	Mud Content [%w/w (<63μm)]	Salinity (psu)	Turbidity (NTU)	Summer Temperature (°C)	Winter Temperature (°C)	Copper (mg/kg )	Lead (mg/kg)	Zinc (mg/kg)
DS2	DS	22.4767	113.959	0.236934	0.414634	0.0139373	0	0.114983	0.00348432	0	0.00696864	0.00348432	0	0	0	0.0278746	0	0	0.125436	0	0	0	6.33676	3	5.8	76.6481	24.3333	19.8	27.25	17.2667	52.9123	55.7544	167.754
DS3	DS	22.4556	113.932	0.228571	0.409524	0.0142857	0	0.185714	0.0047619	0	0.0047619	0.0333333	0	0	0	0.0190476	0.0142857	0	0.0285714	0	0	0.00952381	3.77313	4	5.27885	79.8182	24.4177	21.2427	28.1476	19.617	46.7719	50.5965	126.228
DS4	DS	22.426	113.89	0.277955	0.204473	0.0319489	0	0.0702875	0.0351438	0.00319489	0.00958466	0.00958466	0.0351438	0.00958466	0	0.086262	0.0127796	0.00319489	0.028754	0	0	0	3.10895	8	4.58095	61.2449	28.1445	22.7463	27.2847	20.0337	29.16	42.06	100.42
ES1	ES	22.2622	114.266	0.0862069	0.107759	0.159483	0.0775862	0.0387931	0.0172414	0.0344828	0.00862069	0.0258621	0	0.0474138	0.0172414	0.00431034	0.0387931	0.012931	0	0.00431034	0.0215517	0	3.8697	21	4.49636	47.75	32.9894	7.53708	24.3927	20.1782	49.6379	29.1379	72.1897
ES2	ES	22.2373	114.269	0.0357143	0.117857	0.114286	0.0535714	0.00357143	0.00714286	0.0535714	0.00357143	0.0357143	0.0178571	0.0392857	0.0142857	0.00357143	0.0285714	0.0285714	0.00714286	0.00357143	0.0214286	0	3.31955	21	4.49712	68.2456	33.1846	8.10032	23.9587	20.1433	28.4483	30.5517	74.2759
ES3	ES	22.2742	114.242	0.0373134	0.458955	0.0335821	0.011194	0.0261194	0	0.0149254	0.00746269	0.0298507	0.00746269	0.0298507	0.0223881	0	0	0	0	0	0.00746269	0	6.32733	6	4.87455	80.575	32.0981	5.9773	25.9073	20.4827	330.98	86.3725	291.765
ES4	ES	22.2751	114.256	0.0233645	0.0560748	0.0654206	0.00934579	0.0654206	0.00934579	0.0186916	0.00934579	0.0794393	0.00934579	0.0841121	0.0747664	0	0.0046729	0.0046729	0.0046729	0	0.0373832	0	4.05964	16	4.45446	57.0943	32.6892	7.57237	24.783	20.1856	96.6111	38.3333	108.907
ES5	ES	22.2846	114.23	0.04	0.12	0	0	0	0	0	0	0	0	0.04	0	0	0	0	0	0	0	0	3.83282	12	2.81277	84.0937	32.574	6.42824	24.8128	21.5381	306.605	86.8605	329.372
JS2	JS	22.2915	114.261	0.346154	0.285714	0.0357143	0.0521978	0.0164835	0.00274725	0.0274725	0.021978	0.00549451	0.010989	0.021978	0.0137363	0.00274725	0.00824176	0	0	0	0.0137363	0	4.81611	10	4.71909	82.2545	32.5818	6.82492	25.1855	20.0883	115.912	53.6667	157.825
MS1	MS	22.5497	114.238	0.466667	0.140741	0.0481481	0.0703704	0.00740741	0	0	0.0592593	0.0185185	0.0296296	0.0259259	0.00740741	0	0	0.0037037	0	0	0	0.0111111	10.1622	6	5.47105	86.6604	31.932	8.08496	27.1105	19.8592	39.8491	49.9057	102.792
MS13	MS	22.2167	114.449	0.124464	0.433476	0.00858369	0.128755	0.00429185	0.0643777	0	0	0	0.0300429	0	0	0.0128755	0.0257511	0.0257511	0	0.055794	0	0	3.10128	28	4.98148	89.7907	33.7275	10.1722	23.3074	19.9472	12.6905	32.2857	82.2143
MS14	MS	22.2927	114.449	0.207048	0.312775	0.0440529	0.114537	0	0.0881057	0.030837	0	0	0.0396476	0	0	0.00440529	0.030837	0.0176211	0.00440529	0.0264317	0	0	2.98923	25	4.83692	91.8182	33.6036	9.62513	23.5508	20.0108	11.5455	32.4773	79.0227
MS15	MS	22.3687	114.449	0.124498	0.220884	0.0361446	0.148594	0.0240964	0.0843373	0.0481928	0	0	0.0160643	0.00401606	0	0.0321285	0.0722892	0.0200803	0.00803213	0.0321285	0	0	1.62041	24	4.79231	89.5333	33.502	9.65561	23.6877	19.8923	10.4	30.9111	73.1333
MS16	MS	22.4445	114.449	0.10728	0.164751	0.111111	0.118774	0.00766284	0.0536398	0.0881226	0.00383142	0.0153257	0.0421456	0.00766284	0	0.0114943	0.0498084	0.0229885	0.00383142	0.0344828	0	0	1.66995	22	4.48261	81.1957	33.3369	8.42414	23.9116	19.7239	9.21739	30.6739	69.7174
MS17	MS	22.5032	114.349	0.386076	0.167722	0.174051	0.0632911	0.00949367	0.0316456	0.0822785	0.0253165	0	0.0126582	0.00949367	0.00316456	0	0.00316456	0	0	0	0	0	2.42026	17	3.79603	90.9286	32.9732	5.15816	24.2556	19.1048	16.1525	44.3898	95.0847
MS2	MS	22.5438	114.278	0.445887	0.147186	0.021645	0.034632	0.125541	0	0	0.030303	0.00865801	0.025974	0.034632	0	0	0	0	0	0	0.00865801	0.025974	3.67244	11	4.46842	91.7736	32.5564	5.98894	25.9184	19.6816	20.6981	47.5283	101.415
MS3	MS	22.5619	114.31	0.532143	0.0892857	0.0714286	0.0678571	0.0214286	0.0357143	0.0464286	0.0142857	0.00357143	0.0428571	0.0107143	0	0	0	0.00357143	0.00357143	0	0.00357143	0.00357143	2.85289	16	4.14474	86.1321	32.8964	7.41903	24.9053	19.5645	13.1887	38.8868	81.3019
MS4	MS	22.5636	114.358	0.398438	0.144531	0.296875	0.0546875	0	0.0351562	0.0273438	0.00390625	0	0.0273438	0.00390625	0	0	0	0	0	0	0	0	2.00752	18	4.47368	92.7736	32.9876	6.50221	24.6632	19.5605	14.8679	41.2453	91.434
MS5	MS	22.5206	114.394	0.411765	0.155882	0.191176	0.0205882	0	0.0676471	0.0647059	0.00588235	0.00588235	0.0147059	0.00294118	0	0.00294118	0.00294118	0.00882353	0	0	0	0	1.84537	20	4.31711	87.6792	33.1132	6.99031	24.2539	19.5697	13.8491	42.2642	88.0755
MS6	MS	22.4556	114.35	0.354922	0.158031	0.11399	0.0647668	0.0181347	0.00259067	0.0466321	0.0803109	0.0129534	0.0129534	0.015544	0.0466321	0	0	0.00259067	0	0	0.00259067	0	2.52301	12	4.68158	93.0755	32.6458	5.5696	25.5605	19.4092	16.9057	42.3774	99.3208
MS7	MS	22.5235	114.297	0.12	0.04	0.12	0.02	0.04	0	0	0.16	0.02	0	0.02	0.1	0	0	0	0	0	0.02	0	2.84133	13	4.17368	94.0189	32.6351	5.36504	25.7539	19.6066	19.6415	44.283	97.6226
MS8	MS	22.2004	114.322	0.221774	0.290323	0.133065	0.0645161	0	0.0846774	0.016129	0.0201613	0.00806452	0	0.00806452	0.00806452	0.0201613	0.00806452	0.0524194	0	0.00806452	0.00403226	0	3.20795	31	4.79518	93.381	33.5837	9.1925	23.4602	19.9	14.093	34.7674	85.4651
NS2	NS	22.3522	113.98	0.130282	0.204225	0.0246479	0.00352113	0.0457746	0.056338	0	0	0.0352113	0.0492958	0.0176056	0.0492958	0.0387324	0.0140845	0.00352113	0.00352113	0	0.0105634	0	4.06992	11	4.8	71.6364	29.5286	12.0211	26.7263	20.1562	43.0893	42.875	102.464
NS3	NS	22.3554	113.946	0.18125	0.246875	0.028125	0.0125	0.071875	0.05625	0.003125	0.009375	0.021875	0.04375	0.009375	0.0125	0.053125	0.021875	0	0.021875	0	0.009375	0.003125	4.11047	14	4.09535	66.8491	30.6347	15.472	25.9811	20.0198	35.8246	40.614	96.8947
NS4	NS	22.3842	113.9	0.176768	0.232323	0.020202	0.00505051	0.106061	0.0454545	0	0.00505051	0.0252525	0.010101	0.0252525	0	0.0858586	0.0252525	0.00505051	0.0151515	0	0.010101	0	3.70163	20	3.92317	49.4259	30.1606	24.5824	26.2805	19.972	28.4138	41.7931	97.4138
NS5	NS	22.3646	113.973	0.148148	0.277778	0	0.148148	0.0555556	0.0324074	0.0185185	0.0509259	0.037037	0.0601852	0.00462963	0	0.00925926	0.0231481	0	0.0185185	0	0	0	6.37636	4	4.32	73.5994	31.6837	6.23892	27.55	20.6	106.673	57.5577	170.885
NS6	NS	22.3214	113.898	0.331797	0.18894	0.0552995	0.0552995	0.0322581	0.0460829	0.0184332	0	0.00460829	0.0368664	0.00460829	0	0.0506912	0.00921659	0.00460829	0.0138249	0.00460829	0	0	4.82026	5	5.40658	60.82	27.9974	16.2792	27.3987	19.7613	20.54	34.14	81.34
PS2	PS	22.3798	114.307	0.20339	0.194915	0.0550847	0.0847458	0.182203	0.0127119	0.00423729	0.059322	0.0338983	0.0127119	0.00847458	0	0	0	0	0	0	0	0.00847458	2.24224	6	5.62222	62.7696	32.3573	5.87808	26.9667	19.47	13.574	27.08	61.96
PS3	PS	22.3693	114.282	0.62406	0.12782	0.0037594	0.0338346	0.056391	0.0112782	0	0.018797	0.0150376	0.0075188	0	0.0037594	0	0	0	0	0	0.0150376	0	2.51042	13	4.37477	88.9464	32.9099	4.43512	25.3063	19.4191	28.5345	39.9138	100.931
PS4	PS	22.3621	114.265	0.520661	0.194215	0.00826446	0.0330579	0.152893	0	0.00413223	0.00826446	0.0123967	0.00413223	0.00413223	0	0	0	0	0	0	0	0.0123967	5.39773	5	5.28219	91.457	32.0077	6.62915	27.1507	19.6548	44.7647	40.8627	146.686
PS5	PS	22.3409	114.295	0.2827	0.0970464	0.0253165	0.0843882	0.0126582	0.021097	0.0379747	0	0.021097	0.0253165	0.0253165	0.0168776	0	0.0168776	0.0253165	0	0.0168776	0.00843882	0	1.93821	17	4.24636	56.6818	33.0922	4.85327	24.5691	19.5321	11.7879	28.8788	70.7121
SS1	SS	22.2123	114.231	0.162291	0.126492	0.0381862	0.105012	0.0143198	0.0190931	0.0644391	0	0.0405728	0.0167064	0.0572792	0.0143198	0.0071599	0.0119332	0.0620525	0.0214797	0.00954654	0.00477327	0	3.71944	14	4.68837	74.0893	33.0012	7.47165	24.7709	19.3318	13.7368	30.614	73.1754
SS2	SS	22.2241	114.178	0.207951	0.140673	0.0458716	0.110092	0.00917431	0.0703364	0.0336391	0.0030581	0.0366972	0.0122324	0.0214067	0.0122324	0.0152905	0.00917431	0.0397554	0.0030581	0.030581	0.00611621	0	3.86972	14	4.6186	85.9643	32.0203	6.83945	25.214	19.6263	24.2456	39.5439	101.105
SS3	SS	22.1917	114.079	0.211864	0.20339	0.0338983	0.135593	0.00847458	0.0550847	0.0381356	0	0.0169492	0.0381356	0.0169492	0	0.0127119	0.0254237	0.0127119	0.00847458	0.00423729	0.00847458	0	5.11746	14	4.25581	73.5893	32.7508	9.87891	25.6302	19.2941	26.6207	38.431	95.9138
SS4	SS	22.229	114.075	0.264078	0.227184	0.163107	0.0893204	0.00970874	0.0174757	0.0291262	0.00194175	0.0116505	0.0135922	0.00582524	0.0038835	0.031068	0.0174757	0.0368932	0	0	0	0	5.14229	8	5.05465	85.2857	31.657	10.2805	26.3523	19.4035	39.5263	45.6491	109.596
SS5	SS	22.2574	114.018	0.583554	0.137931	0.106101	0.0954907	0.0106101	0	0	0.00265252	0.0106101	0.0106101	0.00530504	0.00265252	0.00265252	0.00265252	0	0	0	0	0	7.4588	8	5.86098	93.0364	30.7964	10.1276	27.0415	19.1964	40.6667	53.0526	132.719
SS6	SS	22.216	113.962	0.168	0.138667	0.00266667	0.133333	0.0373333	0.0426667	0.0186667	0.00266667	0.016	0.024	0.0346667	0	0.0666667	0.0533333	0.00533333	0.00533333	0	0	0.04	5.2712	6	5.95904	66.0909	31.465	10.1805	26.8699	19.3301	13.0175	27.3509	63.9825
SS7	SS	22.2086	114.025	0.232558	0.0852713	0.0852713	0.0155039	0.0232558	0	0	0.0310078	0.0232558	0.0155039	0.0155039	0.186047	0	0	0	0	0	0	0	6.09625	5	6.22642	73.3041	30.6665	9.13975	27.6189	19.5212	109.686	56	152.431
SS8	SS	22.2456	114.032	0.708791	0.0659341	0.0659341	0.0384615	0.010989	0	0	0	0.010989	0	0.00549451	0.021978	0	0	0	0	0	0	0	7.82317	6	6.84286	94.9182	30.6951	9.28415	27.5964	20.8148	37.2143	50.3571	135.714
TS2	TS	22.433	114.218	0.285068	0.0452489	0.0135747	0.0226244	0.190045	0	0	0.167421	0.0226244	0.00904977	0.0135747	0.00904977	0	0	0	0	0	0.00452489	0.0361991	13.9813	8	3.79542	69.9032	31.8664	4.01123	26.5059	19.5935	39.6923	86.2615	181.631
TS3	TS	22.4476	114.203	0.408867	0.0492611	0.0591133	0.00492611	0.197044	0	0	0.152709	0.0246305	0.0197044	0.00985222	0	0	0	0	0	0	0	0.0246305	14.7536	7	3.99481	73.2656	30.9343	4.22242	26.7065	19.4967	42.9846	92.9846	202.738
TS4	TS	22.4439	114.242	0.394422	0.0756972	0.0876494	0.0517928	0.131474	0.0517928	0.00796813	0.0717131	0.0199203	0.0159363	0.00796813	0.00398406	0	0	0	0	0	0	0.0159363	9.50796	12	3.21382	67.2879	32.415	4.2851	25.4961	19.4667	25.1111	65.9444	130.625
TS5	TS	22.4732	114.3	0.186441	0.0480226	0.502825	0.0282486	0.0254237	0.0706215	0.0169492	0.0621469	0.00282486	0.0225989	0.00282486	0.00564972	0	0	0.00564972	0	0	0	0	5.89355	22	2.9625	86.25	32.7983	5.17115	24.4791	19.2379	21.5294	53.0441	116.735
TS7	TS	22.45	114.209	0.136808	0.0162866	0	0.00325733	0.23127	0	0	0.0618893	0.0423453	0	0	0.00325733	0	0	0	0	0	0	0.00325733	13.0477	6	4.0303	64.231	31.6393	5.17423	27.0697	19.9954	104.931	154.532	149.717
VS10	VS	22.3656	114.109	0.059633	0.0779817	0.0550459	0.0366972	0.0183486	0.0137615	0	0	0.100917	0.0321101	0.0183486	0.151376	0	0	0.00917431	0.00917431	0.00458716	0.0412844	0.00458716	3.53431	11	4.49779	72.6604	30.5213	8.60147	26.3375	20.0547	374.483	67.3333	198.517
VS13	VS	22.2908	114.237	0.0103093	0.14433	0.14433	0	0.0103093	0.0103093	0.0103093	0	0.0721649	0	0	0.0463918	0	0	0	0	0	0	0	4.09625	5	4.13396	88.0949	31.51	7.02938	26.517	20.6923	294.451	106.627	319.608
VS19	VS	22.3098	114.157	0.383721	0.0348837	0.00387597	0.108527	0.0232558	0.00387597	0.0155039	0	0.0232558	0.0387597	0.0813953	0.00775194	0	0	0	0.0232558	0	0	0	4.75635	5	3.39512	75.2893	30.4104	11.8768	26.9195	21.4881	88.0233	59.6047	176.442
VS21	VS	22.3238	114.143	0.333333	0	0	0	0	0	0	0.333333	0.111111	0.111111	0	0	0	0	0	0	0	0	0	7.2869	5	4.47778	94.0325	30.3446	12.547	27.3741	21.5821	139.036	50.3929	214.643
VS5	VS	22.2846	114.177	0.0294118	0	0.0588235	0.0588235	0	0	0	0	0.117647	0	0.176471	0.0294118	0	0	0	0	0	0	0	4.26634	8	3.67226	61.25	31.2398	6.41522	25.7279	19.6887	152.839	60.3214	184.018
VS6	VS	22.2962	114.14	0.185185	0.222222	0.037037	0.037037	0	0.148148	0	0.037037	0.037037	0	0.037037	0	0	0	0	0	0	0	0	3.74236	10	4.0562	66.0185	31.6405	8.43333	25.9197	19.8515	151.966	82.069	191.103
VS9	VS	22.3293	114.121	0.146341	0.10061	0.0213415	0.125	0.0243902	0.0518293	0.0731707	0.0243902	0.054878	0.0182927	0.0335366	0.0365854	0.00609756	0.00609756	0.0121951	0.0121951	0.0121951	0	0.00304878	3.42463	14	3.85735	82.3929	31.8308	13.0208	25.6015	19.8824	150.847	48.9153	136.898
WS2	WS	22.2507	114.123	0.0984252	0.165354	0.0866142	0.0748031	0.0275591	0.0551181	0.0433071	0.011811	0.0472441	0.0275591	0.023622	0.00393701	0.0472441	0.019685	0.015748	0	0.00787402	0.00393701	0	4.26987	35	4.029	86.4727	33.0062	10.9511	24.5653	20.0502	39.6429	40.5536	106.679
